# Supplementary material for: Phanerozoic paleoenvironmental and paleoclimatic evolution in Svalbard
Source: Copernicus journal article supplement (doi:10.5194/egusphere-2024-3912), 2025-01-14
Supplement: Supplementary file 1 [file egusphere-2024-3912-supplement.zip]

## Sheet: Crmbr-Ordov
	Publication references	DOI/URL/ URI	Publication authors	Time period	Lithostratigraphy	Section				Proxies and data						Comments	other methods
						Drill core / outcrop	Length	Lithology	Location	Biological	climate sensitive facies	d13C	δ18O	Rock-Eval	Sampling resolution	(main focus)	-
1	Abay, T.B., Karlsen, D.A., Olaussen, S., Pedersen, J.H. and Hanken, N.-M., 2022. Organic geochemistry of Cambro-Ordovician succession of Ny Friesland, Svalbard, High Arctic Norway: Petroleum generation potential and bulk geochemical properties. Journal of Petroleum Science and Engineering, 218:	https://doi.org/10.1016/j.petrol.2022.111033	Abay et al., 2022	Lower Cambrian, Lower to Middle Ordovician	Tokammane Formation, Kirtonryggen and Valhallfonna formations	17 samples	-	carbonaceous rocks	Ny Friesland, Basissletta			Stable carbon isotope analyses (δ13C), not in a profile		TOC, Rock-Eval			thin layer chromatography–flame ionization detection (TLC-FID) and scanning electron microscope (SEM)
2	Bennett, C. E., Williams, M., Leng, M. J., Lee, M. R., Bonifacie, M., Calmels, D., Fortey, R.A., Laurie, J.R., Owen, A. W., Page, A.A., Munnecke, A. & Vandenbroucke, T. R. (2018). Oxygen isotope analysis of the eyes of pelagic trilobites: Testing the application of sea temperature proxies for the Ordovician. Gondwana Research, 57, 157-169.	https://doi.org/10.1016/j.gr.2018.01.006	Bennett et al., 2018	Early to Middle Ordovician	Valhallfonna Formation	outcrop	-	-	Ny Friesland	trilobites			trilobite eye calcite, carbonate clumped isotope compositions (Δ47), and yielded crystallization temperatures above 50 °C				Scanning electron microscope (SEM), cathodoluminescence (CL), electron microprobe and Electron Backscatter Diffraction (EBSD)
3	Fortey, R. A., and D. L. Bruton. "Cambrian-Ordovician rocks adjacent to Hinlopenstretet, North Ny Friesland, Spitsbergen." Geological Society of America Bulletin 84, no. 7 (1973): 2227-2242.	https://doi.org/10.1130/0016-7606(1973)84%3C2227:CRATHN%3E2.0.CO;2	Fortey & Bruton , 1973	Cambrian-Ordovician (Early Cambrian, and Early Ordovician	Tokammane Formation , Valhallfonna Formation	outcrop	903	quartzite, dolomite, limestone	Ny Friesland	trilobite and trace fossils
5
4	Gobbett, Derek John, and C. B. Wilson. "The Oslobreen Series, Upper Hecla Hoek of Ny Friesland, Spitsbergen." Geological Magazine 97, no. 6 (1960): 441-457.	https://doi.org/10.1017/S0016756800061835	Gobbett and Wilson, 1960	Lower Cambrian and a Canadian	Oslobreen series	outcrop	1,210 metres	quartzite, dolomite, limestone	Ny Friesland ?	Fauna
5	Hansen, Jesper, and Lars Erik Holmer. "Diversity fluctuations and biogeography of Ordovician brachiopod faunas in northeastern Spitsbergen." Bulletin of Geosciences 85, no. 3 (2010): 497-504.	https://doi.org/10.3140/bull.geosci.1178	Hansen and Holmer, 2010	Lower and Middle Ordovician	Kirtonryggen Formation and Valhallfonna Formation	outcrop	903	quartzite, dolomite, limestone	Ny Friesland, Basissletta and Olenidsletta plains	Brachiopods, 13,500 brachiopod specimens
6	Kröger , B., Finnegan, S., Franeck, F., Hopkins, M.J., 2017. The ordovician succession adjacent to Hinlopenstretet, Ny Friesland, spitsbergen. Am. Mus. Novit. 3882, 1–28.	https://doi.org/10.1206/3882.1	Kröger et al., 2017	Ordovician (Tremadocian–Darriwilian)	Kirtonryggen and Valhallfonna formations	outcrop	843m	dolostones and limestones	Ny Friesland, (Basissletta and Olenidsletta)		depositinal environment
7	Lee, C., Love, G. D., Hopkins, M. J., Kröger, B., Franeck, F., & Finnegan, S. (2019). Lipid biomarker and stable isotopic profiles through Early-Middle Ordovician carbonates from Spitsbergen, Norway. Organic Geochemistry, 131, 5-18.	https://doi.org/10.1016/j.orggeochem.2019.02.008	Lee et al., 2019	Early to Middle Ordovician (the Tremadocian through Upper Dapingian )	Oslobreen Group: Kirtonryggen Formation, Valhallfonna Formation,	outcrop	-	carbonate-rich strata	Ny Friesland	Marine microbial communities, bacterial lipid markers, Olenid trilobite fossils		d13C		yes			bulk nitrogen isotopes (d15Ntotal); Gas chromatography-mass spectrometry (GC-MS), Gas chromatography-metastable reaction monitoring (GC-MRM)
8	Lehnert, O., Stouge, S., & Brandl, P. A. (2013). Conodont biostratigraphy in the Early to Middle Ordovician strata of the Oslobreen Group in Ny Friesland, Svalbard. Zeitschrift der Deutschen Gesellschaft fur Geowissenschaften, 164(1), 149-172.	http://dx.doi.org/10.1127/1860-1804/2013/0003	Lehnert et al. (2013),	Lower to lower Middle Ordovician	Kirtonryggen and Valhallfonna formations	outcrop			Ny Friesland	Conodonts
9	Stouge, Svend, Jørgen Løye Christiansen, and Lars Erik Holmer. "Lower palaeozoic stratigraphy of murchisonfjorden and sparreneset, nordaustlandet, svalbard." Geografiska Annaler: Series A, Physical Geography 93, no. 4 (2011): 209-226.	https://doi.org/10.1111/j.1468-0459.2011.00433.x	Stouge et al., 2011	the Lower Cambrian to Lower (perhaps Mid) Ordovician	Kap Sparre Formation	outcrop	minimum c. 450 m	limestone, dolostones, Black shale, green, quartzite	Murchisonfjorden and eastern Nordaustlandet	tracefossils and linguliform brachiopods, Salterella and traces of olellenid trilobites	deeper water and shallow carbonate platform
10	Stouge, S., Harper, D. A., Boyce, W. D., & Christiansen, I. K. L. (2012). development of the lower Cambrian–Middle Ordovician carbonate platform: North Atlantic Region.	https://doi.org/10.1306/13331509M983508	Stouge et al., 2012	the Lower Cambrian to Lower (perhaps Mid) Ordovician	Tokammane, Kirtonryggen, Valhallfonna Formation	outcrop		sandstone, dolostone	Ny Friesland, Nordaustlandet	Trace fossils, macrofauna including trilobites, conodont fauna, stromatolites	deeper water and shallow carbonate platform

## Sheet: Devonian
	Publication references	DOI/URL/ URI	Publication authors	Time period	Lithostratigraphy	Section				Proxies and data						Comments	other methods
						Drill core / outcrop?	Length	Lithology	Location	Bological	climate sensitive facies	d13C	δ18O	Rock-Eval	Sampling resolution	(main focus)	-
1	Armstroff, A., Wilkes, H., Schwarzbauer, J., Littke, R., & Horsfield, B. (2006). Aromatic hydrocarbon biomarkers in terrestrial organic matter of Devonian to Permian age. Palaeogeography, Palaeoclimatology, Palaeoecology, 240(1-2), 253-274.	https://doi.org/10.1016/j.palaeo.2006.03.052	Armstroff et al., 2006	Devonian-Permian	Mimerdalen Subgroup, Billefjorden Group	Outcrop	-	coal seams	Billefjorden		coal	-	-	yes	-	Coal	Extraction and liquid chromatography; Gas chromatography (GC); Gas chromatography–mass spectrometry (GC–MS)
2	Berry, C. M. (2005). ‘Hyenia’vogtii Høeg from the Middle Devonian of Spitsbergen—Its morphology and systematic position. Review of Palaeobotany and Palynology, 135(1-2), 109-116.	https://doi.org/10.1016/j.revpalbo.2005.03.001	Berry 2005,	Middle Devonian (Givetian)	the Fiskekløfta Member of the Mimerdalen Formation	Samples from the Natural History Museum,University of Osleo University of Oslo	-	-	Munindalen	branching patterns of Hyenia vogtii Høeg		-	-		-
3	Berry, C. M., & Marshall, J. E. (2015). Lycopsid forests in the early Late Devonian paleoequatorial zone of Svalbard. Geology, 43(12), 1043-1046.	https://doi.org/10.1130/G37000.1	Berry & Marshall, 2015	early Late Devonian, Frasnian (ca. 380 Ma).	Mimerdalen Subgroup, Plantekløfta Formation,	Outcrop	4,5m	interbedded mudstones, conglomerates, paleosols	Munindalen	standing lycopsids trees; lycopsid tree microspores and megaspores	paleosols	-	-	-	125 samples	paleobotany and palynology (microspores)	-
4	Blumenberg, M., Weniger, P., Kus, J., Scheeder, G., Piepjohn, K., Zindler, M., & Reinhardt, L. (2018). Geochemistry of a middle Devonian cannel coal (Munindalen) in comparison with Carboniferous coals from Svalbard. arktos, 4(1), 1-8.	https://doi.org/10.1007/s41063-018-0038-y	Blumenberg et al., 2018	Middle Devonian in comparison to early Carboniferous	Mimerdalen Subgroup, Billefjorden Group	Outcrop	-	coal seams	Munindalen, Ebbadalen and Brucebyen (Billefjorden)	-	coal	δ13CTOC of coal samples		yes	at least 8		Bulk geochemistry (TOC, S, δ13C, Rock–Eval); biomarker analyses
5	Blomeier, D., Wisshak, M., Dallmann, W., Volohonsky, E., & Freiwald, A. (2003). Facies analysis of the Old Red Sandstone of Spitsbergen (Wood Bay Formation): reconstruction of the depositional environments and implications of basin development. Facies, 49(1), 151-174.	https://doi.org/10.1007/s10347-003-0030-1	Blomeier et al., 2003a	Early Devonian	Wood Bay Formation, Andrée Land Group	Outcrops	-	FU sequences (conglomerates, sandstones, mudstones…), fine-grained material (silt/mudstones), wackestones, packstones, grainstones	Raudfjorden fault block, Andrde Land fault block; NE parts of the Devonian basin	graptolites, conodonts, fish, vertebrates, mollusc, ostracods, polynomorph	calcacerous, alluvial and lacustrine facies	-		-	300 thinn sections, 30 polished slabs	Woodbay Fm. (rivers, alluvial plains, perennial lakes)	-
6	Blomeier, D., Wisshak, M., Joachimski, M., Freiwald, A., & Volohonsky, E. (2003). Calcareous, alluvial and lacustrine deposits in the Old Red Sandstone of central north Spitsbergen (Wood Bay Formation, Early Devonian). Norwegian Journal of Geology/Norsk Geologisk Forening, 83(4).		Blomeier et al., 2003b	Early Devonian	Wood Bay Formation, Andrée Land Group	Outcrops, 22 bulk samples	-	FU sequences (sandstones, siltstones, mudstones +conglomerates & calcacerous intercalations)	entire outcrop area of the Wood Bay Formation		Calcareous deposits (Pedogenic calcretes), alluvial and lacustrine facies (including epheremal lake)	bulk samples δ13C of choosen samples	bulk samples δ18O of choosen samples	-	88 thin sections, 36 polished slabs	Woodbay Fm. (Dicksonfjorden & Verdalen Mb., calcacerous deposits)	Bio-induced carbonate percipitation with carbon and oxygen isotope values ranging from –0.6 to –0.7 ‰ and –7.6 to –8.8 ‰, Lake deposits: stable isotope composition of –2.1 to –3.1 ‰ for δ13C and –9.5 to –10.9 ‰ for δ18O
7	Davies, N. S., Berry, C. M., Marshall, J. E., Wellman, C. H., & Lindemann, F. J. (2021). The Devonian landscape factory: plant–sediment interactions in the Old Red Sandstone of Svalbard and the rise of vegetation as a biogeomorphic agent. Journal of the Geological Society, 178(5).	https://doi.org/10.1144/jgs2020-225	Davies et al., 2021	Silurian to Late Devonian	Siktefjellet Group. Red bay Group, Andree Land Goup,	outcrops		FU sequences (sandstones, siltstones, mudstones +conglomerates & calcacerous intercalations)	Entire Devonian Basin,	plant material, rooting structures, early large woody debris accumulations, vegetation-induced sedimentary structures	cannel coal,	-	-	-
8	Friend, P. F., Harland, W. B., Rogers, D. A., Snape, I., & Thornley, R. S. W. (1997). Late Silurian and Early Devonian stratigraphy and probable strike-slip tectonics in northwestern Spitsbergen. Geological Magazine, 134(4), 459-47	https://doi.org/10.1017/S0016756897007231	Friend et al., 1997	Late Silurian and Early Devonian	Siktefjellet and Red Bay groups	Outcrops	over 240m	Sandstones, conglomerates and siltstones	Raudfjorden	fossil vertebrate faunas	-	-		-	-		-
9	Wisshak, M., Volohonsky, E., Seilacher, A. & Freiwald, A. (2004) 06 15: A trace fossil as-semblage from ̄uvial Old Red deposits (Wood Bay Formation; Lower to Middle Devo-nian) of NW-Spitsbergen, Svalbard.Lethaia, Vol. 37, pp. 149±163. Oslo. ISSN 0024-1164	https://doi.org/10.1080/00241160410005763	Wisshak et al., 2004a	Lower to Middle Devonian	WoodBay Formation		-		Woodfjorden	trace fossil assemblage including Svalbardichnus trilobus, Cruziana polaris	-	-	-
10	Wisshak, M., Volohonsky, E., & Blomeier, D. (2004). Acanthodian fish trace fossils from the Early Devonian of Spitsbergen. Acta Palaeontologica Polonica, 49(4).		Wisshak et al., 2004b	Lower to Middle Devonian	Wood Bay Formation, Andrée Land Group	Sandstone slab from the Natural History Museum,University of Osleo University of Oslo	-		Woodfjorden	Undichna septemsulcata trace fossil by acanthodian (possibly Diplacanthus)	-	-	-
11	Vigran, J. O. (1964). Spores from Devonian deposits, Mimerdalen, Spitsbergen. NORSK POLARINSTITUTT, 1-49. SKRIFTER NR. 132		Vigran 1964	Devonian	Mimerdalen Subgroup,	samples from pervous expeditions	-	-	Mimerdalen	spores	-	-	-

## Sheet: Carboniferous-Permian
	Publication references	DOI/URL/ URI	Publication authors	Time period	Lithostratigraphy	Section				Proxies and data						Comments	other methods
						Drill core / outcrop?	Length/ resolution	Lithology	Location	Bological	climate sensitive facies	d13C	δ18O	Rock-Eval	Sampling resolution	(main focus)	-
1	Ahlborn, M., & Stemmerik, L. (2015). Depositional evolution of the Upper Carboniferous - Lower Permian Wordiekammen carbonate platform, Nordfjorden High, central Spitsbergen, Arctic Norway. Norsk Geologisk Tidsskrift, 95(1), 91-126.	http://dx.doi.org/10.17850/njg95-1-03	Ahlborn, M., & Stemmerik, L. (2015)	Upper Carboniferous - Lower Permian (Moscovian to Early Sakmarian)	Wordiekammen Formation	Outcrops	13 vertical sections along 25 km-long, E-W cross section (Nordfjorden High) and 11 km-long strike section (Billefjorden)	carbonates	Nordfjorden High, Billefjorden	fusulinids (dating) paleoaplysina	warm water carbonate, microcodium, carst,	-		-	thin sections		Wordiekammen carbonate platform
2	Blomeier, D., Scheibner, C., & Forke, H. (2009). Facies arrangement and cyclostratigraphic architecture of a shallow-marine, warm-water carbonate platform: the Late Carboniferous Ny Friesland Platform in eastern Spitsbergen (Pyefjellet Beds, Wordiekammen Formation, Gipsdalen Group). Facies, 55(2), 291-324.	https://doi.org/10.1007/s10347-008-0163-3	Blomeier et al, 2009	Late Carboniferous (Moscovian-Kasimovian)		Outcrops	-	Minkinfjellet, Wordiekammen Fm.	Ny Friesland	warm water carbonates (shallowing-upwards cycles bounded by marine flooding surfaces)	-	-		-	thin sections		Wordiekammen carbonate platform
3	Blomeier, D., Dustira, A., Forke, H., & Scheibner, C. (2011). Environmental change in the Early Permian of NE Svalbard: from a warm-water carbonate platform (Gipshuken Formation) to a temperate, mixed siliciclastic-carbonate ramp (Kapp Starostin Formation). Facies, 57(3), 493-523.	https://doi.org/10.1007/s10347-010-0243-z	Blomeier et al., 2011	Permian	Gipshuken and Kapp Starostin Fm.	outcrops	-	gypsum, carbonates, silisiclastics	E-Spitsbergen, SW-Nordaustlandet	macrofossils and microfossils	gypsum, warm and cool water carbonates	-		-	-	-	detailed microfacial studies (three vertical sections)
4	Blomeier, D., Dustira, A. M., Forke, H., & Scheibner, C. (2013). Facies analysis and depositional environments of a storm-dominated, temperate to cold, mixed siliceous-carbonate ramp: the Permian Kapp Starostin Formation in NE Svalbard. Norwegian Journal of Geology/Norsk Geologisk Forening, 93(2).		Blomeier et al., 2013	Permian	Kapp Starostin Fm.	outcrops	-	Spiculithes	stratotype locations for the Palanderbukta Member at Zeipelfjella (Nordaustlandet)	calcacerous, glauconitic sandstones, silicified skeletal limestones (brachiopods, bryozoans, crinoids, siliceous sponge spiculae), nodular cherts	temperate carbonates	-	-	-		205 thin sections	facies analysis (four vertical sections)
5	Bond, D. P., Wignall, P. B., Joachimski, M. M., Sun, Y., Savov, I., Grasby, S. E., Beauchamp, B., & Blomeier, D. P. (2015). An abrupt extinction in the Middle Permian (Capitanian) of the Boreal Realm (Spitsbergen) and its link to anoxia and acidification. Bulletin, 127(9-10), 1411-1421.	https://doi.org/10.1130/B31216.1	Bond et al., 2015	Middle - Late Permian (Capitanian!)	Kapp Starostin Formation	outcrops			Festningen, Van Keulenhamna, Eholmen, Forkastningsdalen	brachiopods and bivalvae, mollusc		d13C org			several hundred samples for thin sections and geochemical analysis		87Sr/86Sr; biostratigraphy, logging and sampling
6	Buggisch, W., Blomeier, D., & Joachimski, M. M. (2012). Facies, diagenesis and carbon isotopes of the Early Permian Gipshuken Formation (Svalbard). Zeitschrift der Deutschen Gesellschaft fur Geowissenschaften, 163(3), 309.	DOI: 10.1127/1860-1804/2012/0163-0309	Buggish et al., 2012	Early Permina	Gipshuken Formation and Lower Kapp Starostin Formation	215 m thick sedimentary sequence		dolomite/gypsum alternations	Tålmodryggen	Fossils and microfossils		Stable carbon isotopes in the lower part of the Gipshuken Formation exhibit δ13C- early diagenesis and dolomitisation			81 samples	Stable carbon isotopes in the lower part of the Gipshuken Formation exhibit δ13C values similar to those known from open marine settings indicating that early diagenesis and dolomitisation took place in marine derived pore water solution. Distinctly lowered δ13C values in the upper Gipshuken Formation point to an infl uence of remineralisation of organic carbon and lower δ13CDIC during diagenesis…
7	Cutbill, J. L., & Challinor, A. (1965). Revision of the stratigraphical scheme for the Carboniferous and Permian rocks of Spitsbergen and Bjørnøya. Geological Magazine, 102(5), 418-439.	https://doi.org/10.1017/S0016756800053693	Cutbill and Challinor 1965	Carboniferous-Permian	Billefjorden and Gipsdalen groups	outcrop	-	silisiclastics, carbonates, evaporites	Spitsbergen and Bjørnøya	-	silisiclastics, carbonates, evaoprites
8	Fairchild, I. J. (1982). The Orustdalen Formation of Brøggerhalvøya, Svalbard: a fan delta complex of Dinantian/Namurian age. Polar Research, 1982(1), 17-34.	https://doi.org/10.1111/j.1751-8369.1982.tb00470.x	Fairchild et al. 1982	Early Carboniferous, Dinantian/ Namurian age	Orustdalen Formation	Outcrops	222m	conglomerates and sandstones	Brøggerhalvaya	plants fragments, spores					6 samples, only 2 with spores
9	Gjelberg, J. G., & Steel, R. J. (1981). An outline of Lower-Middle Carboniferous sedimentation on Svalbard: Effects of tectonic, climatic and sea level changes in rift basin sequences.		Gjelberg and Steel, 1981	Early- Middle Carboniferous	Billefjorden Group and lowermost Gopsdalen Group	outcrops	several scetions 200-800m	silisiclastics, carbonates, evaoprites, coal	(1) Bjørnøya (2) Hornsund area (Spitsbergen) (3) Billefjorden (Spitsbergen	-	coal-bearing strata to red beds
10	GruszczyŃski, M., HaŁas, S., Hoffman, A., & Małkowski, K. (1989). A brachiopod calcite record of the oceanic carbon and oxygen isotope shifts at the Permian/Triassic transition. Nature, 337(6202), 64-68.	https://doi.org/10.1130/B31216.1	Gruszczynski et al. 1989;	Permian (from Kungurian to Changsinghian?)	Kapp Starostin Formation	outcrop		Chert, limestone, silisiclstics	Western Spitsbergen			d13C brachiopod shells	brachiopod shells				mass spectrometry on C02; ;;Be and 5 180 notation (relative to the PDB standard,
11	Hanken, N. M., & Nielsen, J. K. (2013). Upper Carboniferous–Lower Permian Palaeoaplysina build-ups on Svalbard: the influence of climate, salinity and sea-level. Geological Society, London, Special Publications, 376(1), 269-305.	https://doi.org/10.1144/SP376.17	Hanken & Nielsen, 2013	Upper Carboniferous–Lower Permian		Outcrops	-	Wordiekammen Fm.	Central Spitsbergen (Pyefjellet, Tyrrellfjellet)	warm water carbonate (fusulinid/margins/barren dolostones, Paleoaplisina boundstones, evaporites, fusulinids (dating), corals, gastropods, brachiopods, bryozoans, echinoderms, trace fossils	-	-		-	polished slabs		Wordiekammen carbonate platform
12	Holliday, D. W., & Cutbill, J. L. (1972). The Ebbadalen Formation (Carboniferous), Spitsbergen. Proceedings of the Yorkshire Geological Society, 39(1), 1-32.		Holliday & Cutbill, 1972	Carbonifeoius, Bashkirian	Ebbadalen Formation	outcrops	-	silisiclastics, carbonates, evaporites,	Billefjorden		soil profiles, calcrete, evaporites, warm water carbonates	-	-	-	-	-	-
13	Hüneke, H., Joachimski, M., Buggisch, W., & Lützner, H. (2001). Marine carbonate facies in response to climate and nutrient level: the Upper Carboniferous and Permian of Central Spitsbergen (Svalbard). Facies, 45(1), 93-135.	https://doi.org/10.1007/BF02668107	Hüneke et al., 2001	Carboniferous-Permian (Bashkirian to Kazanian)	Gipsdalen and Tempelfjorden Gps.	11 outcrop localities	200 m of strata along the fjord cliffs at Billefjorden and Ausfjorden	carbonates,	Gipsdalen area, central Spitsbergen (Boltonbreen, Alvrekdalen, Skansbukta)	microfacies; shift from Photozoan to Heterozoan associations from phylloid algae, brachiopods, bryozoans, siliceous sponges, fusulinids, green algae, Paleoaplisina, Tubiphytes, foraminifers, echinoderms incidate climatic cooling	-	-		-	450 samples for polished slabs and thin sections (500x)		The carbonate production mode has been mainly changed (1) by a significant
14	Johannessen, E. P., & Steel, R. J. (1992). Mid-Carboniferous extension and rift-infill sequences in the Billefjorden Trough, Svalbard. Norsk geologisk tidsskrift, 72(1), 35-48.		Johannessen & Steel, 1992	Serpukhovian-Bashkirian	Hulrberget and Ebbadalen Formation	outcrop	23 logs, max > 500m.	mixed silisiclastics, carbonates and evaporites	Inner Billefjoreden, Odellfjelelt	-	soil profiles, calcrete, evaporites, warm water carbonates	-	-	-	-	-
15	Lopes, G., Mangerud, G., & Clayton, G. (2019). The palynostratigraphy of the Mississippian Birger Johnsonfjellet section, Spitsbergen, Svalbard. Palynology, 43(4), 631-649.	https://doi.org/10.1080/01916122.2018.1518849	Lopes et al. 2019	Mississippian, Visean in Central Spitsbergen	Hørbyebreen and Mumien fm,	58 samples	260m thick section	-	Birger Johnsonfjellet, Billefjorden	Terrestrial palynomorphs
16	Michelsen, J. K., & Khorasani, G. K. (1991). A regional study on coals from Svalbard: organic facies, maturity and thermal history. Bulletin de la Societe Geologique de France;(France), 162(2).		Michelsen, J. K., & Khorasani, G. K. 1991	Uppermost Devonian and Paleogene	Billefjorden Group	outcrop		coal seams	Central, western Spitsbergen, Prins Karls Forland; Bjørnøya		coal	-			-	coal seams from Svalbard; Large Paleogene gas generation from Lower Carboniferous coals.	(petrographic and chemical analysis, reflectance photometry, chromatography, microfluorometry, multivariate data analysis)
17	Mii, H. S., Grossman, E. L., & Yancey, T. E. (1997). Stable carbon and oxygen isotope shifts in Permian seas of West Spitsbergen-Global change or diagenetic artifact?. Geology, 25(3), 227-230.	https://doi.org/10.1130/0091-7613(1997)025%3C0227:SCAOIS%3E2.3.CO;2	Mii et al. 1997;	Permian	Kapp Starostin Formation	outcrop, brachiopod shells		-	West Spitsbergen		temperate carbonates	brachiopod shells	brachiopod shells				petrographic, cathodoluminescence, electron-microprobe,
18	Nicolaisen, J. B., Elvebakk, G., Ahokas, J., Bojesen‐Koefoed, J. A., Olaussen, S., Rinna, J., Skeie, J.E. & Stemmerik, L. (2019). Characterization of upper Palaeozoic organic‐rich units in Svalbard: Implications for the petroleum systems of the Norwegian Barents shelf. Journal of Petroleum Geology, 42(1), 59-78.	https://doi.org/10.1111/jpg.12724	Nicolaisen et al., 2019	Carboniferous-early Permian	Hørbyebreen Fm- Gipshuken Fm	395 samples, 110 samples analyzed in more detail	475m	coal and organic-rich mudstones and carbonates	Central Spitsbergen, aroud Tempelfjorden, Billefjorden, Dicksonfjorden and Ekmanfjorden			cross-plots		TOC	395 samples, 110 samples analyzed in more detail
19	Nielsen, J. K., BŁażejowski, B., Gieszcz, P., & Nielsen, J. K. (2013). Carbon and oxygen isotope records of Permian brachiopods from relatively low and high palaeolatitudes: climatic seasonality and evaporation. Geological Society, London, Special Publications, 376(1), 387-406.	https://doi.org/10.1144/SP376.6	Nielsen et al. 2013 ;	late Early and early Late Permian	Kapp Starostin Formation	outcrop, brachiopod shells		limestones	Vindodden section;	brachiopods	temperate carbonates	d13C of Horridonia timanica	δ18O of Horridonia timanica			-
20	Oordt, A. J., Soreghan, G. S., Stemmerik, L., & Hinnov, L. A. (2020). A record of dust deposition in northern, mid-latitude Pangaea during peak icehouse conditions of the late Paleozoic ice age. Journal of Sedimentary Research, 90(4), 337-363.	https://doi.org/10.2110/jsr.2020.15	Oordt et al., 2020	Moscovian (Carboniferous) through Sakmarian (Permian)	Wordiekammen Formation	outcrop	Moscovian (10 m) and Asselian (27 m), at 20 cm resolution	carbonates	Asvindalen, Billefjorden	Bioherms	Cyclostratigraphy of the carbonates and exposure surfaces (Karst and microcodium)				20cm		silicate-mineral fraction (SMF); Dust record and geochemical ratios; Ti/Zr an Al/Zr (ICP-MS results of Ti, Al, K, Zr, La, SC, Th; detrital-zircon geochronology
21	Scheibner, C., Hartkopf-Fröder, C., Blomeier, D., & Forke, H. (2012). The Mississippian (Lower Carboniferous) in northeast Spitsbergen (Svalbard) and a re-evaluation of the Billefjorden Group. Zeitschrift der Deutschen Gesellschaft für Geowissenschaften, 293-308.	DOI: 10.1127/1860-1804/2012/0163-0293	Scheibner et al., 2012	Famennian, Visean to early Serpukhovian in NE Spitsbargen	Billefjorden Group	outcrop	115 m thick, 40 m of the Billefjorden Gp.	Dark organic-rich shales, light coloures sandstones (Billefjorden Gp.) red coloured sandstones (Gipsdalen Gp.)	Northeastern Spitsbergen (Lomfjorden Troug: Ny Friesland, Lomfjella, Lomfjorden, Ditlovtoppen Nunatak)	plants fragments, spores; Densosporites sp suggest wet climate.lycopsids and fi licopsids) make up more than 50 %	red beds	-		-	15 samples (miospore analysis - hydrochloric and hydrofluoric acids, sieving; thermal maturity, biostratigraphy)
22	Smyrak-Sikora, A., Nicolaisen, J. B., Braathen, A., Johannessen, E. P., Olaussen, S., & Stemmerik, L. (2021). Impact of growth faults on mixed siliciclastic-carbonate-evaporite deposits during rift climax and reorganisation—Billefjorden Trough, Svalbard, Norway. Basin Research, 33(5), 2643-2674.	https://doi.org/10.1111/bre.12578	Smyrak-Sikora et al., 2021	Upper Carboniferous	Billefjorden Gp. - Wordiekammen Fm.	Outcrops	-	mixed silisiclastic-carbontes-evaporites	Inner Billefjorden	-	evaporite-carbonate cycles	-	-	-	-	-	cooling within shallow-water marine environments of
23	Smyrak-Sikora, A., Johannessen, E. P., Olaussen, S., Sandal, G., & Braathen, A. (2019). Sedimentary architecture during Carboniferous rift initiation–the arid Billefjorden Trough, Svalbard. Journal of the Geological Society, 176(2), 225-252.	https://doi.org/10.1144/jgs2018-100	Smyrak-Sikora et al., 2019	Carboniferous	Billefjorden Gp. - Wordiekammen Fm.	Outcrops	40 km2	mixed silisiclastic-carbontes-evaporites	Inner Billefjorden	plant rooltets traces	evaporites, carbonates, calcreates, soil profiles	-	-	-	-	microfossils pointing to teopical to temperate water temperatre shift
24	Sorento, T., Olaussen, S., & Stemmerik, L. (2020). Controls on deposition of shallow marine carbonates and evaporites–lower Permian Gipshuken Formation, central Spitsbergen, Arctic Norway. Sedimentology, 67(1), 207-238.	https://doi.org/10.1111/sed.12640	Sorento et al., 2020	Lower Permian (Sakmarian- Artinskian ?)	Gipshuken fm	outcrop	962 m	Vengeberget member (Gipshuken Formation)	Ekmanfrojden, Tempelfjorden	-	evaporite-carbonate cycles	-	-	-	-	54 thin sections	facial analysis (11 logs)
25	Stemmerik, L. (2000). Late Palaeozoic evolution of the North Atlantic margin of Pangea. Palaeogeography, Palaeoclimatology, Palaeoecology, 161(1-2), 95-126.	https://doi.org/10.1016/S0031-0182(00)00119-X	Stemmerik 2000	Uppermost Devonian - Pemian	Billefjorden Gp- Tempelfjorden Gp	outcrop revision	-	siliciclastics, evaporites and carbonates	Svalbard, Greenland, Finnmark platform	biostratigraphy: fusulinids, cono- donts, small foraminifers, ammonoids and palynomorphs	evaporites, warm and cool water carbonates	-	-	-	-
26	Stemmerik, L. (2008). Inﬂuence of late Paleozoic Gondwana glaciations on the depositional evolution of the northern Pangean shelf, North Greenland, Svalbard, and the Barents Sea (Vol. 441, pp. 205-217). Geological Society of America.	https://doi.org/10.1130/2008.2441(14)	Stemmerik 2008	Bashkirian-Sakmarian	Gipsdalen Group	outcrops	-	siliciclastics, evaporites and carbonates	Svalbard, Greenland,		Cyclostratigraphy of the carbonates, evaporites, silisiclastics and exposure surfaces (Karst and microcodium)	-	-	-	-

## Sheet: PT boundary
	Publication references	DOI/URL/ URI	Publication authors	Time period	Lithostratigraphy	Section				2							Comments	other methods
						Drill core / outcrop?	Length	Lithology	Location	Biological	climate sensitive facies	d13C	δ18O	Rock-Eval/TOC	Hg	Sampling resolution	(main focus)	-
1	Bond, D.P.G. & Wignall, P.B. 2010: Pyrite framboid study of marine Permian–Triassic boundary sections: A complex anoxic event and its relationship to contemporaneous mass extinction. GSA Bulletin 122, 1265-1279, doi: 10.1130/B30042.1.	https://doi.org/10.1130/B30042.1	Bond and Wignall, 2010	Changhsingian-Griesbachian	Kapp Starostin-Vardebukta-Vikinghogda Fm	outcrop	50 m	sandstones, siltstones and mudstones	Festningen and Kongressfjellet	-	-	-	-	-	-	bed by bed	Pyrite framboid as a redox dynamic study
2	Dustira, A. M., Wignall, P. B., Joachimski, M., Blomeier, D., Hartkopf-Fröder, C., & Bond, D. P. (2013). Gradual onset of anoxia across the Permian–Triassic boundary in Svalbard, Norway. Palaeogeography, Palaeoclimatology, Palaeoecology, 374, 303-313.	https://doi.org/10.1016/j.palaeo.2013.02.004	Dustria et al., 2013	Changhsingian-Griesbachian	Kapp Starostin - Vikinghogda Fm.	outcrop	5 m	chert, glauconitic sandstones and siltstones	Kongressfjellet	-	-	d13Corg at Tschermakfjellet	-	-	-	every 10 cm or more	Redox dynamics;	pyrite framboid sizes
3	Foster, W. J. (2015). Palaeoecology of the late Permian mass extinction and subsequent recovery. PhD thesis, University of Plymouth	https://pearl.plymouth.ac.uk/handle/10026.1/5467	Foster, 2015	Changhsingian-Spathian	Kapp Starostin, Vikinghogda and Vardebukta Fms	outcrops	> 250 m	sandstones, siltstones, mudstones and concretions	Festningen, Lusitaniadalen and Deltadalen	Molluscs, bioturbation and inarticulate brachiopods	chert	-	-	-	-	bed by bed	palaeoecology
4	Foster, W. J., Danise, S. & Twitchett R. J., (2017) A silicified Early Triassic marine assemblage from Svalbard, Journal of Systematic Palaeontology, 15:10, 851-877,	10.1080/14772019.2016.1245680	Foster et al., 2017	Changhsingian-Griesbachian	Vikinghøgda Fm.	outcrop	15 m	siltstones, mudstone and carbonate concretions	Lusitaniadalen	mollusc	-	-	-	-	-	two concretionary horizons	palaeoecology
5	Foster, W.J., Hirtz, J.A., Farrell, C. et al. Bioindicators of severe ocean acidification are absent from the end-Permian mass extinction. Sci Rep 12, 1202 (2022). https://doi.org/10.1038/s41598-022-04991-9	https://doi.org/10.1038/s41598-022-04991-9	Foster et al., 2022	Changhsingian-Griesbachian	Vikinghøgda Fm.	outcrop	15 m	siltstones, mudstone and carbonate concretions	Lusitaniadalen	mollusc	-	-	-	-	-	every 50 cm, but the productive samples come from concretionary horizons	ocean acidifcation proxy	bioindicators (dissolution and repair marks)
6	Foster, W. J., Asatryan, G., Rauzi, S., Botting, J. P., Buchwald, S. Z., Lazarus, D. B., et al. (2023). Response of siliceous marine organisms to the Permian-Triassic climate crisis based on new findings from central Spitsbergen, Svalbard. Paleoceanography and Paleoclimatology, 38, e2023PA004766.	https://doi.org/10.1029/2023PA004766	Foster et al., 2023	Changhsingian-Griesbachian	Vikinghøgda Fm.	outcrop	15 m	siltstones, mudstone and carbonate concretions	Lusitaniadalen	radiolarians and siliceous sponges	chert	-	-	-	-	every 50 cm, but the productive samples come from concretionary horizons	palaeoecology / Earth's thermostat
7	Grasby, Stephen E., Benoit Beauchamp, David PG Bond, Paul Wignall, Cristina Talavera, Jennifer M. Galloway, Karsten Piepjohn, Lutz Reinhardt, and Dierk Blomeier. "Progressive environmental deterioration in northwestern Pangea leading to the latest Permian extinction." Bulletin 127, no. 9-10 (2015): 1331-1347.	https://doi.org/10.1130/B31197.1	Grasby et al., 2015a	Changhsingian-Griesbachian	Kapp Starostin Fm.-Vardebukta Fm.	outcrop	20 m	siltstones, mudstones and sandstones, cherts	Festningen	-	-	δ13C organic carbon.	-	-	-	every 10 cm	palaeoenvironmental reconstruction	U/Pb date, Pyrite-associated iron (Fepy). (B) Molybdenum. (C) Uranium. (D) Vanadium. (E) Nickel. TOC. TIC. Nitrogen isotope values. Chemical index of alteration (CIA).
8	Grasby, Stephen E., Benoit Beauchamp, David PG Bond, Paul B. Wignall, and Hamed Sanei. "Mercury anomalies associated with three extinction events (Capitanian crisis, latest Permian extinction and the Smithian/Spathian extinction) in NW Pangea." Geological magazine 153, no. 2 (2015): 285-297.	https://doi.org/10.1017/S0016756815000436	Grasby et al., 2015b	Changhsingian-Spathian	Kapp Starostin Fm.-Vardebukta Fm- Tvillingodden Fm.	outcrop	550 m	|	Festningen	-	-	-	-	TOC	Hg/TOC	~ 1 m	palaeoenvironmental reconstruction
9	Grasby, Stephen E., Jochen Knies, Benoit Beauchamp, David PG Bond, Paul Wignall, and Yadong Sun. "Global warming leads to Early Triassic nutrient stress across northern Pangea." Bulletin 132, no. 5-6 (2020): 943-954.	https://doi.org/10.1130/B32036.1	Grasby et al., 2020	Changhsingian-Spathian	Kapp Starostin Fm.-Vardebukta Fm- Tvillingodden Fm.	outcrop	550 m	siltstones, mudstones and sandstones, cherts	Festningen	-	-	-	-	-	-	~ 1 m	palaeoenvironmental reconstruction	N and P changes
10	Grotheer, Hendrik, P. Le Métayer, M. J. Piggott, E. J. Lindeboom, A. I. Holman, R. J. Twitchett, and Kliti Grice. "Occurrence and significance of phytanyl arenes across the Permian-Triassic boundary interval." Organic Geochemistry 104 (2017): 42-52.	https://doi.org/10.1016/j.orggeochem.2016.12.002	Grotheer et al., 2017	Changhsingian-Griesbachian	Kapp Starostin Fm.-Vikinghøgda Fm.	outcrop	15 m	siltstones and mudstone	Lusitaniadalen	Lipid biomarkers	-	-	-	-	-	A few choice samples	palaeoenvironmental reconstruction
11	Lee, Sangmin, G. R. Shi, Hans A. Nakrem, Jusun Woo, and Jun-Ichi Tazawa. "Mass extinction or extirpation: Permian biotic turnovers in the northwestern margin of Pangea." GSA Bulletin 134, no. 9-10 (2022): 2399-2414.	https://doi.org/10.1130/B36227.1	Lee et al., 2022	Artinskian-Lopingian	Kapp Starostin	outcrop	375 m	siltstones, mudstones and sandstones, cherts	Festningen	brachiopods and bryozoans	-	-	-	-	-	fossilifereous beds	Timing of extinction
12	Mørk, A., Elvebakk, G., Forsberg, A. W., Hounslow, M. W., Nakrem, H. A., Vigran, J. O., & Weitschat, W. (1999). The type section of the Vikinghogda Formation: a new Lower Triassic unit in central and eastern Svalbard. Polar research, 18(1), 51-82.	https://doi.org/10.1111/j.1751-8369.1999.tb00277.x	Mørk et al., 1999a;	Changhsingian-Spathian	Vikinghogda Formation	outcrop	~ 250 m	glauconitic sandstones, sandstones, siltstones, mudstones and concretions	Deltadalen and Lusitaniadalen	Palynology and macroinvertebrates	-	-	-	-	-	bed by bed	Stratigraphy investigation
13	Nabbefeld, Birgit, Kliti Grice, Richard J. Twitchett, Roger E. Summons, Lindsay Hays, Michael E. Böttcher, and Muhammad Asif. "An integrated biomarker, isotopic and palaeoenvironmental study through the Late Permian event at Lusitaniadalen, Spitsbergen." Earth and Planetary Science Letters 291, no. 1-4 (2010): 84-96.	https://doi.org/10.1016/j.epsl.2009.12.053	Nabbefeld et al., 2010	Changhsingian-Griesbachian	Kapp Starostin Fm.-Vikinghøgda Fm.	outcrop	15 m	siltstones and mudstone	Lusitaniadalen	Lipid biomarkers		-	-	-	-	every bed for 2 m	palaeoenvironmental reconstruction
14	Rauzi, Sofia., William J. Foster., Satoshi Takahashi., Rie S. Hori., Brian J. Beatty., Lidya G. Tarhan and Terry Isson. "Lithium isotopic evidence for enhanced reverse weathering during the Early Triassic warm period" PNAS (2024)	https://doi.org/10.1073/pnas.2318860121	Rauzi et al., 2024	Changhsingian-Anisian	Kapp Starostin Fm.-Brevaisberget Fm.	outcrop	700 m	siltstones, sandstones and mudstones	Festningen, Lusitaniadalen							systematically every 1m	lithium isotopic composition, δ7Li, reverse weathering
15	Regelous, M., Regelous, A., Grasby, S. E., Bond, D. P., Haase, K. M., Gleißner, S., & Wignall, P. B. (2020). Tellurium in late permian‐early triassic sediments as a proxy for siberian flood basalt volcanism. Geochemistry, Geophysics, Geosystems, 21(11), e2020GC009064.	https://doi.org/10.1029/2020GC009064	Regelous et al., 2020	Changhsingian-Spathian	Kapp Starostin Fm. Varderbukta Fm. Tvillingodden Fm.	outcrop	~ 70 m	siltstones, mudstones and sandstones, cherts	Festningen section			δ13Corganic		TOC	Hg concentrations		High mercury, siderophile elements Ni, Zn, Cd, Sb, Te, Re, and Tl
16	Rodríguez-Tovar, F. J., Dorador, J., Zuchuat, V., Planke, S., & Hammer, O. (2021). Response of macrobenthic trace maker community to the end-Permian mass extinction in Central Spitsbergen, Svalbard. Palaeogeography, Palaeoclimatology, Palaeoecology, 581, 110637.	https://doi.org/10.1016/j.palaeo.2021.110637	Rodríguez-Tovar et al., 2021	Upper Permian - Lower Triassic	Kapp Starostin Fm., Vikinghøgda Fm.	drill core	~200 m	limestone, spiculitic mudstone, arenitic sandstone, glauconitic sandstone	Deltadalen	Crinoids, brachiopods, bryozoans, corals, trace fossils		d13C org	-	-	-	-	The End of Permian Mass Extinction (ichnological analysis, high resolution imagery)
17	Schobben, Martin, William J. Foster, Arve RN Sleveland, Valentin Zuchuat, Henrik H. Svensen, Sverre Planke, David PG Bond et al. "A nutrient control on marine anoxia during the end-Permian mass extinction." Nature Geoscience 13, no. 9 (2020): 640-646.	https://doi.org/10.1038/s41561-020-0622-1	Schobben et al., 2020	Changhsingian-Griesbachian	Kapp Starostin, Vardebukta and Vikinghogda Fms.	drill core and outcrop	~ 20 m	chert, glauconitic sandstones and mudstones	Deltdalen and Festningen	-	-	d13Corg	-	-	-	-	OMZ reconstruction	Fe and P speciation
18	Uchman, A., Hanken, N. M., Nielsen, J. K., Grundvåg, S. A., & Piasecki, S. (2016). Depositional environment, ichnological features and oxygenation of Permian to earliest Triassic marine sediments in central Spitsbergen, Svalbard. Polar Research, 35(1), 24782.	https://doi.org/10.3402/polar.v35.24782	Uchman et al., 2016	Carbonifereous-Griesbachian	Gipshuken.Kapp Starostin-Vikinghogda Fm.	outcrop	390 m	chert, sandstones, siltstones and mudstones	Marmierfjellet, Belvedeerdalen	bioturbation	-	-	-	-	-	-	paleoecology and redox dynamics
19	Wignall, P. B., & Twitchett, R. J. (1996). Oceanic anoxia and the end Permian mass extinction. Science, 272(5265), 1155-1158.	https://doi.org/10.1126/science.272.5265.1155	Wignall and Twitchett, 1996	Changhsingian-Griesbachian	Kapp Starostin - vardebukta Fm	outcrop	~ 60 m	chert, siltstone, mudstone	Kapp Starostin (Festningen), Kapp Wijk, and Sveltihel	bioturbation		-	-	-	-	-
20	Wignall, P. B., Morante, R., & Newton, R. (1998). The Permo-Triassic transition in Spitsbergen: δ13Corg chemostratigraphy, Fe and S geochemistry, facies, fauna and trace fossils. Geological Magazine, 135(1), 47-62.	doi:10.1017/S0016756897008121	Wignall et al., 1998	Changhsingian-Dienerian	Kapp Starostin Fm.-Vardebukta Fm and Vikinghogda	outcrop	> 150 m	sandstones, siltstones, mudstones and cherts	Festningen, Kongressfjellet	bioturbation	-	d13Corg	-	-	-	every bed	"Dickson Land" is a composite of ourcrops on Kongressfjellet, Lithostratigraphy of Kongressfjellet also updated here	Fe and S
21	Zuchuat, V., Sleveland, A. R. N., Twitchett, R. J., Svensen, H. H., Turner, H., Augland, L. E., Jones, M., Hammer, Ø., Hauksson, B., & Planke, S. (2020). A new high-resolution stratigraphic and palaeoenvironmental record spanning the End-Permian Mass Extinction and its aftermath in central Spitsbergen, Svalbard. Palaeogeography, Palaeoclimatology, Palaeoecology, 554, 109732.	https://doi.org/10.1016/j.palaeo.2020.109732	Zuchuat et al., 2020	P-T boundary	Kapp Starostin Fm., Vikinghøgda Fm.	drill cores (two - depth ca. 100 m) and outcrop	~90 m	glauconitic cherty sandstone	central Spitsbergen (Deltadalen)	trace fossils		d13C	-	Rock-Eval 6 (pyrolysis) Jet-Rock 1 (10 samples), TOC		152 samples (C isotope analysis)	P-T boundary (stratigraphic logging, sampling, XRF, petrography, biostratigraphy, isotope geochemistry, geochronology, tephra layers - electron microscopy, evolutionary spectral analysis)

## Sheet: Triassic
	Publication	DOI/URL/ URI	Publication	Time period	Lithostratigraphy	Section				Proxies and data							Comments	-
						Drill core / outcrop?	Length	Lithology	Location	Biological	climate sensitive facies	d13C	δ18O	Rock-Eval/ TOC	Hg	Sampling resolution	(main focus)	-
1	Blattmann, F.R., Schneebeli-Hermann, E., Adatte, T., Bucher, H.F.R., Vérard, C., Hammer, Ø., Luz, Z.A.S. & Vennemann, T.W. (2024): Palaeoenvironmental variability and carbon cycle perturbations during the Smithian-Spathian (Early Triassic) in Central Spitsbergen. Lethaia 57, 1-14, doi: 10.18261/let.57.2.1.	https://doi.org/10.18261/let.57.2.1	Blattman et al., 2024	Smithian-Spathian	Vikinghogda Formation	outcrops			Stensiöfjellet, Sassendalen			d13Corg		TOC
2	Bratvold, J., Delsett, L.L., & Hurum, J.H. (2018): Chondrichthyans from the Grippia Bonebed (Early Triassic) of Marmierfjellet, Spitsbergen. Norwegian Journal of Geology 2, 189-217		Bratvold, 2018	Early Triassic (Spathian)	Vendomdalen Member of Vikinghøgda Formation	outcrop	80 cm	mudstones, sandstones	Marmierfjellet, Flowerdalen	Shark teeth						Approximately 250–300 kg of material was obtained
3	Buchan, S. H., Challinor, A., Harland, W. B., & Parker, J. R. (1965). The Triassic stratigraphy of Svalbard. Norsk Polarinstitutt, Oslo, 1-98.	chrome-extension://efaidnbmnnnibpcajpcglclefindmkaj/https://brage.npolar.no/npolar-xmlui/bitstream/handle/11250/173590/Skrifter135.pdf?sequence=1	Buchan 1964	Triassic	Sassendalen and Kapp Toscana Groups	outcrop	-	mudstones,	entire Svalbard	Triassic fossils
4	Ekeheien, C., Delsett, L. L., Roberts, A. J., & Hurum, J. H. (2018). Preliminary report on ichthyopterygian elements from the Early Triassic (Spathian) of Spitsbergen. Norwegian Journal of Geology, 98(2), 219-238.	https://dx.doi.org/10.17850/njg98-2-07	Ekeheien et al., 2018	Early Triassic (Spathian)	Vendomdalen Member of Vikinghøgda Formation	outcrop	80cm	black shale, dolomite	Marmierfjellet, Flowerdalen	Ichthyopterygian elements, jaw elements of Omphalosaurus	-	-	-	-	-	-
5	Engelschiøn, Victoria Sjøholt, Sofie Bernhardsen, Fredrik Wesenlund, Øyvind Hammer, Jørn Harald Hurum, and Atle Mørk (2023). "Bivalve beds reveal rapid changes in ocean oxygenation in the Boreal Middle Triassic–a case study from Svalbard, Norway."	https://doi.org/10.17850/njg103-2-1	Engelschiøn et al, 2023a	Middle Triassic	Botneheia Formation	outcrop	33 m	organic-rich marine black mudstone	Edgeøya	Bivalve (Daonella), trace fossils (Thalassinoides), mixosaurid vertebra and spine, algal mats				Total organic carbon (TOC)			oxygenation proxies, size distribution of framboidal pyrite
6	Engelschiøn, V.S., Delsett, L.L., Roberts, A.J. & Hurum, J.H. (2018): Large-sized ichthyosaurs from the Lower Saurian niveau of the Vikinghøgda Formation (Early Triassic), Marmierfjellet, Spitsbergen. Norwegian Journal of Geology 98, 239-265	http://urn.nb.no/URN:NBN:no-74211	Engelschiøn et al., 2018	Spathian	Vendomdalen Member of Vikinghøgda Formation	Outcrop	1 m	Siltstones and shale	Marmierfjellet, Flowerdalen	Large ichthyosaurs, Cymbospondylus						cm-scale	Undescibed ichthyosaurs
7	Engelschiøn, V.S., Roberts, A.J., With, R. & Hammer, Ø. 2023: Exceptional X-Ray contrast: Radiography imaging of a Middle Triassic mixosaurid from Svalbard. PLOS ONE 18, e0285939,	https://doi.org/10.1371/journal.pone.0285939	Engelschiøn et al, 2023b	Middle Triassic	Botneheia Formation	outcrop	33 m	organic-rich marine black mudstone	Edgeøya								Fossil preservation in black shales: sulphate and sulphide precipitation and pseudomorphing
8	Galfetti, T., Hochuli, P. A., Brayard, A., Bucher, H., Weissert, H., & Vigran, J. O. (2007). Smithian-Spathian boundary event: Evidence for global climatic change in the wake of the end-Permian biotic crisis. Geology, 35(4), 291-294.	https://doi.org/10.1130/G23117A.1	Galfetti et al., 2007c;	Smithian-Spathian	Vikinghogda Formation	outcrops	65 m	sandstones, siltstones, mudstones and concretions	Kongressfjellet	ammonoids and palynology	-	d13Corg	-	-	-	bed by bed	corrected for a location name
9	Hammer, Ø., Jones, M. T., Schneebeli-Hermann, E., Hansen, B. B., & Bucher, H. (2019). Are Early Triassic extinction events associated with mercury anomalies? A reassessment of the Smithian/Spathian boundary extinction. Earth-Science Reviews, 195, 179-190.	https://doi.org/10.1016/j.earscirev.2019.04.016	Hammer et al. 2019	Smithian-Spathian	Vikinghogda Formation	outcrops	100 m	sandstones, siltstones, mudstones and concretions	Wallenbergfjellet	ammonoids	-	d13Corg	-	TOC	Hg/TOC	every 1m	geochemistry
10	Hansen, B.B., Bucher, H.F., Schneebeli-Hermann, E. & Hammer, Ø. (2024): Smithian and Spathian palaeontological records of the Vikinghøgda Formation in Central Spitsbergen. Lethaia 57, 1-15	https://doi.org/10.18261/let.57.1.3	Hansen et al, 2024	Smithian-Spathian	Vikinghogda Formation	outcrops	100 m		Wallenbergfjellet
11	Hatleberg, E. W. Clark D.L. (1984). Lower Triassic conodonts and biofacies interpretations: Nepal and Svalbard. Geologica et Palaeontologica, 18, 101-125.		Hattleberg and Clark, 1984;	Lower Triassic	Vardebukta, Tvillingodden and Brevaisberget formations	outcrops	> 200 m	sandstones, siltstones and mudstones	Reinodden, Pitnerodden and Ahlstrandodden	conodonts	-	-	-	-	-	bed by bed	biostratigraphy
12	Hurum, J. H., Roberts, A. J., Nakrem, H. A., Stenløkk, J. A., & Mørk, A. (2014). The first recovered ichthyosaur from the Middle Triassic of Edgeøya, Svalbard. Norwegian Petroleum Directorate Bulletin, 11, 97-110.	Online 1894-7670, ISBN 978-82-7257-117-6.	Hurum et al., 2014	Middle Triassic	Botneheia Formation	outcrop	350 m	contretions	Muen, Edgeøya	marine reptiles	-	-	-	-	-	bed by bed	marine reptile evolution	-
13	Hurum, J.H., Engelschiøn, V.S., Økland, I., Bratvold, J., Ekeheien, C., Roberts, A.J., Delsett, L.L., Bolvig, B., Mørk, A. & Nakrem, H.A., Druckenmiller, P. S., & Hammer, Ø. (2018): The history of exploration and stratigraphy of the Early to Middle Triassic vertebrate-bearing strata of Svalbard (Sassendalen Group, Spitsbergen). Norwegian Journal of Geology, 98(2), 165-174.	https://dx.doi.org/10.17850/njg98-2-04	Hurum et al 2018	Smithian-Spathian	Vikinghogda Formation	outcrop	50 m	concretions	Ledalen, Flowerdalen	marine reptiles	-	-	-	-	-	bed by bed	marine reptile evolution
14	Kear, B. P., Engelschiøn, V. S., Hammer, Ø., Roberts, A. J., & Hurum, J. H. (2023). Earliest Triassic ichthyosaur fossils push back oceanic reptile origins. Current Biology, 33(5), R178-R179.	http://creativecommons.org/licenses/by/4.0/	Kear et al., 2023	Early Triassic	Vikinghogda Formation	outcrop	-	-	Flowerdalen, Marmierfjellet	Earliest Triassic ichthyosaur							X-ray fl uorescence (XRF)
15	Krajewski, K. P. (2008). The Botneheia Formation (Middle Triassic) in Edgeøya and Barentsøya, Svalbard: lithostratigraphy, facies, phosphogenesis, paleoenvironment. Polish Polar Research, 29(4), 319-364.		Krajewski, 2008	Middle Triassic	Botneheia Formation	outcrops	100 m	organic carbon-rich, fine-grained clastic succession	Edgeøya and Barentsøya								Selected XRD patterns, Paleoenvironmental interpretation
16	Krajewski, K. P. (2013). Organic matter–apatite–pyrite relationships in the Botneheia Formation (Middle Triassic) of eastern Svalbard: Relevance to the formation of petroleum source rocks in the NW Barents Sea shelf. Marine and Petroleum Geology, 45, 69-105.	https://doi.org/10.1016/j.marpetgeo.2013.04.016	Krajewski, 2013,	Middle Triassic	Botneheia Formation	outcrops	100 m	organic carbon-rich, fine-grained clastic succession	Edgeøya and Barentsøya					TOC			redox conditions, authigenic apatite, and pyrite, XRD patterns of representative samples
17	Leu, M., Schneebeli-Hermann, E., Hammer, Ø., Lindemann, F.-J. & Bucher, H. (2024): Spatiotemporal dynamics of nektonic biodiversity and vegetation shifts during the Smithian–Spathian transition: conodont and palynomorph insights from Svalbard. Lethaia 57, 1-19	https://doi.org/10.18261/let.57.2.3	Leu et al., 2024	Smithian-Spathian	Vikinghogda Formation	Outcrops	115 m		Stensiöfjellet, Sassendalen			d13Corg
18	Lord, G. S., Johansen, S. K., Stoen, S. J., & Mork, A. (2017). Facies development of the Upper Triassic succession on Barentsoya, Wilhelmoya and NE Spitsbergen, Svalbard. Norwegian Journal of Geology/Norsk Geologisk Forening, 97(1).	https://dx.doi.org/10.17850/njg97-1-03	Lord et al., 2017	Upper Triassic	De Geerdalen Formation	outcrops	-	siltstones and sandstones	Barentsøya, Wilhelmøya and NE Spitsbergen	CU units (progradating, fluvial dominated delta systém)		-	-	-	-	-	logging, sedimentological facies analysis	-
19	Lord, G. S., Mørk, A., Haugen, T., Boxaspen, M. A., Husteli, B., Forsberg, C. S., Heggem, S.,& Olaussen, S. (2022). Stratigraphy and palaeosol profiles of the Upper Triassic Isfjorden Member, Svalbard.	https://hdl.handle.net/11250/3058759	Lord et al. 2022	Upper Triassic	Isfjorden Member, he De Geerdalen Formation	outcrops		siltstones and sandstones	central Spitsbergen and Edgeøya	root traces, rhizoliths	palaeosol and caliche profiles
20	Maxwell, E.E. & Kear, B.P. (2013): Triassic ichthyopterygian assemblages of the Svalbard archipelago: a reassessment of taxonomy and distribution. Journal of the Geological Society of Sweden 135, 85-94, 10.1080/11035897.2012.759145.	https://doi.org/10.1080/11035897.2012.759145	Maxwell & Kear, 2013 ;	Triassic (Olenekian-Carnian)	Vikinghøgda, Botneheia and Tschermakfjellet Formations	outcrops	-	-	Svalbard	Ichthyopterygians
21	Mueller, S., Veld, H., Nagy, J. & Kürschner, W.M. (2014): Depositional history of the Upper Triassic Kapp Toscana Group on Svalbard, Norway, inferred from palynofacies analysis and organic geochemistry. Sedimentary Geology 310, 16-29,	https://doi.org/10.1016/j.sedgeo.2014.06.003	Mueller et al., 2014	Upper Triassic	Kapp Toscana	outcrops	240m	siltstones and sandstones	Juvdalskampen and Botneheia	Palynofacies, wood, organic debrees		d13Corg		TOC [%],
22	Mueller, S., Hounslow, M.W. & Kürschner, W.M. (2016): Integrated stratigraphy and palaeoclimate history of the Carnian Pluvial Event in the Boreal realm; new data from the Upper Triassic Kapp Toscana Group in central Spitsbergen (Norway). Journal of the Geological Society 173, 186-202	https://doi.org/10.1144/jgs2015-028	Mueller et al., 2016	Upper Triassic	Kapp Toscana	outcrops		siltstones and sandstones		pollen assemblage	principal component analysis	d13Corg
23	Nakrem, H. A., & Mørk, A. (1991). New Early Triassic Bryozoa (Trepostomata) from Spitsbergen, with some remarks on the stratigraphy of the investigated horizons. Geological Magazine, 128(2), 129-140.	https://doi.org/10.1017/S001675680001832X	Nakrem and Mørk, 1991	Lower Triassic	Vardebukta and Tvillingodden	outcrop	> 500 m	carbonaceous sandstones	Brevaisberget, Treskelen, Bjornskardet, Askjokeltinden, Lieddalen	bryozoans	-	-	-	-	-	bed by bed	bryozoan diversity
24	Nakrem, Hans Arne, Michael J. Orchard, Wolfgang Weitschat, Mark W. Hounslow, Tyler W. Beatty, and Atle Mørk. (2008) "Triassic conodonts from Svalbard and their Boreal correlations." Polar Research 27, no. 3: 523-539.	https://doi.org/10.1111/j.1751-8369.2008.00076.x	Nakrem et al., 2008	Early-Middle Triassic and Carnian	Vardebukta, Tvillingodden, Brevaisberget and Vikinghogda, Botneheia formations	outcrop, 81 samples	-	-	Milne Edwardsfjellet and material revision from Akseløya, Bjørnskardet and Austjøkeltinden and Deltadalen	conodonts	-	-	-	-	-	productive beds	biostratigraphy, review
25	Paterson, N. W., & Mangerud, G. (2020). A revised palynozonation for the Middle–Upper Triassic (Anisian–Rhaetian) series of the Norwegian Arctic. Geological Magazine, 157(10), 1568-1592.	https://doi.org/10.1017/S0016756819000906	Paterson, N. W., & Mangerud, G. 2020	Triassic- Jurassic	Sassendalen and Kapp Toscana Gp.	wells (stratigraphical cores and exploration wells from the southern Barents Sea)	-	siltstones and sandstones	Svalbard Archipelago and Barents Sea region	marine palynomorphs		-	-	-	-	-	palynology	-
26	Pott, C. (2012). The Upper Triassic flora of Svalbard. Acta Palaeontologica Polonica, 59(3), 709-740.	https://doi.org/10.4202/app.2012.0090	Pott, C. 2012.	Upper Triassic (Carnian)	Kapp Toscana (De Geerdalen Formation)	outcrop	-	siltstones and sandstones	27 localities of Spitsbergen, Barentsoya, Edgeoya and Hopen	plant fossils (24 spicies identified + one new),	coal	-	-	-	-	245 specimens	flora	-
27	Rismyhr, B., Bjarke, T., Olaussen, S., Mulrooney, M. J., & Senger, K. (2018). Facies, palynostratigraphy and sequence stratigraphy of the Wilhelmoya Subgroup (Upper Triassic–Middle Jurassic) in western central Spitsbergen, Svalbard. Norsk Geologisk Tidsskrift, 99(4), 35-64.	https://doi.org/10.17850/njg001	Rismyhr et al., 2018	Upper Triassic–MiddleJurassic	Wilhelmøya Subgroup	drillcore and outcrop data (drillcores from the four Longyearbyen CO2 Lab)	15–24 m	mudstones, sandstones and conglomerates	Festningen, Konusdalen, Mafhøgda, DH2,DH 4, DH 5, DH 7	palynology		-	-	-	-	33 samples +1	palynology, sedimentological and sequence-stratigraphic interpretations, facies	-
28	Salamon, M. A., Hanken, N., Gorzelak, P., Riise, H. E., & Ferré, B. (2015). Crinoids from Svalbard in the aftermath of the end− Permian mass extinction. Polish Polar Research, 225-238.		Salamon et al., 2015	Smithian-Spathian	Tvillingodden Formation	outcrop	190 m	sandstones, siltstones, mudstones and concretionary beds	Mariaholmen	echinoderms	-	-	-	-	-	productive samples	echioderm evolution
29	Wignall, P.B., Bond, D.P.G., Sun, Y., Grasby, S.E., Beauchamp, B., Joachimski, M.M. & Blomeier, D.P.G. 2016: Ultra-shallow-marine anoxia in an Early Triassic shallow-marine clastic ramp (Spitsbergen) and the suppression of benthic radiation. Geological Magazine 153, 316-331,	https://doi.org/10.1017/S0016756815000588	Wignall et al., 2016	Lower Triassic	Vardebukta and Tvillingdodden Fm., Vikinghøgda Formation (Kapp Starostin Formation)	Outcrop	>500m	sandstones, siltstones, dolomitic limestones, shales (shallowing-upwards trends),	Festningen, Forkastningsdalen, Tschermakfjellet, Vindodden	conodonts, ammonoids, trace fossils, benthic community,		d13Corg				180 shale beds of the Festningen section were sampled for trace metal assay
30	Wesenlund, F., Grundvåg, S. A., Engelschiøn, V. S., Thießen, O., & Pedersen, J. H. (2021). Linking facies variations, organic carbon richness and bulk bitumen content–A case study of the organic-rich Middle Triassic shales from eastern Svalbard. Marine and Petroleum Geology, 132, 105168.	https://doi.org/10.1016/j.marpetgeo.2021.105168	Wesenlund et al., 2021	Middle Triassic	Botneheia Formation	outcrop	75 m	organic-rich siltstone and mudstone	Edgeøya			d13Corg		TOC			total sulfur, total organic carbon, bulk bitumen content, and relative and absolute aromatic hydrocarbon content, Optical vitrinite reflectance
31	Wesenlund, F., Grundvåg, S. A., Engelschiøn, V. S., Thießen, O., & Pedersen, J. H. (2022). Multi‐elemental chemostratigraphy of Triassic mudstones in eastern Svalbard: Implications for source rock formation in front of the World’s largest delta plain. The Depositional Record, 8(2), 718-753.	https://doi.org/10.1002/dep2.182	Wesenlund et al., 2022	Lower– Upper Triassic	Vendomdalen Member, Botneheia and Tschermakfjellet formations	outcrop	140 m	organic-rich siltstone and mudstone	Edgeøya					TOC– TIC– TS		89 samples from three localities,	Elemental chemostratigraphy; 34 elements were acquired using combustion and X- ray fluorescence analyses
32	Worsley, D., & Mørk, A. (2001). The environmental significance of the trace fossil Rhizocorallium jenense in the Lower Triassic of western Spitsbergen. Polar Research, 20(1), 37-48.	https://doi.org/10.3402/polar.v20i1.6498	Worsley and Mørk, 2001	Lower Triassic	Vardebukta and Tvillingodden	outcrop	500 m	sandstones, siltstones and mudstones	Festningen	bioturbation	-	-	-	-	-	bed by bed	depositional environment reconstruction

## Sheet: Jurassic-Cretaceous
	Speelman et al. 2009	DOI/URL/ URI	Publication	Time period	Lithostratigraphy	Section				Proxies and data							Comments
						Drill core / outcrop	Length	Lithology	Location	Biological	climate sensitive facies	d13C	δ18O	Rock-Eval	Hg	Sampling resolution	(main focus)
1	Bjærke, T. (1978). Mesozoic palynology of Svalbard III. Dinoflagellates from the Rurikfjellet Member, Janusfjellet Formation (Lower Cretaceous) of Spitsbergen. Palynologia num extraordin, 1, 69-93.	-	Bjærke, 1978	Early Cretaceous	Rurikfjellet Member, Janusfjellet Formation	outcrop	three sections ca. 200 m (Fig. 2 and Table II)	mudstones (black shale)	Wimanfjellet, Knorringfjellet, Agardhfjellet	Palynology (marine)						104 samples in total
2	Dalseg, T. S., Nakrem, H. A., & Smelror, M. (2016). Dinoflagellate cyst biostratigraphy, palynofacies, depositional environment and sequence stratigraphy of the Agardhfjellet Formation (Upper Jurassic-Lower Cretaceous) in central Spitsbergen (Arctic Norway). Norwegian Journal of Geology, 96(2), 1-14.	http://dx.doi.org/10.17850/njg96-2-04	Dalseg et al., 2016;	Late Jurassic–Early Cretaceous	Agardhfjellet Formation, Slottsmøya Member	outrop	Two sections 84 m and 47m	mudstones and carbonate seeps	Janusfjellet and Knorringfjellet	Two dinoflagellate cyst assemblage zones, Palynofacies analysis						41 samples
3	Delsett, L.L., Novis, L.K., Roberts, A.J., Koevoets, M.J., Hammer, Ø., Druckenmiller, P.S. & Hurum, J.H. (2016): The Slottsmøya marine reptile Lagerstätte: depositional environments, taphonomy and diagenesis. Geological Society, London, Special Publications 434, 165-188, doi: 10.1144/SP434.2.	https://doi.org/10.1144/SP434.2	Delsett et al., 2016;	Late Jurassic—earliest Cretaceous (c. 150–139 Ma)	the Slottsmøya Member	outcrop	70 m	mudstones (black shale), paleo methane seeps	Janusfjellet Mountain
4	Delsett, L. L., Roberts, A. J., Druckenmiller, P. S., & Hurum, J. H. (2017). A new ophthalmosaurid (Ichthyosauria) from Svalbard, Norway, and evolution of the ichthyopterygian pelvic girdle. PloS one, 12(1), e0169971.	DOI:10.1371/journal.pone.0169971	Delsett et al., 2017;	Berriasian/ Jurassic–Cretaceous boundary	the Slottsmøya Member	outcrop	50 m	mudstone, siltstone, carbonate beds	Janusfjellet	Ophthalmosaurid (Ichthyosauria)
5	Delsett, L. L., Druckenmiller, P. S., Hammer, Ø., Hryniewicz, K., Knutsen, E. M., Koevoets, M. J., Nakrem, H.A., Roberts, A.J., & Hurum, J. H. (2019). Mesozoic marine reptiles from Spitsbergen and their ecosystems. Geology Today, 35(1), 20-25.	https://doi.org/10.1371/journal.pone.0169971	Delsett,et al., 2019;	Late Jurassic—earliest Cretaceous (c. 150–139 Ma)	the Slottsmøya Member	outcrop	70 m	mudstones (black shale), paleo methane seeps	Janusfjellet Mountain	marine reptiles (nearly sixty specimens), diverse assemblage of invertebrates
6	Ditchfield, P. W. (1997). High northern palaeolatitude Jurassic-Cretaceous palaeotemperature variation: new data from Kong Karls Land, Svalbard. Palaeogeography, palaeoclimatology, palaeoecology, 130(1-4), 163-175.	https://doi.org/10.1016/S0031-0182(96)00054-5	Ditchfield, 1997;	Middle Bathonian to Kimmeridgian	Kongsoya Formation	samples collected by the 1969 Norske Fina/Cambridge Svalbard Expedition (the Sedgwick Museum, University of Cambridge)	-	-	Kong Karls Land, Svenskoya and Kongsoya	Belemnites		δ13C PDB; belemnite	δ18O PDB belemnites
7	Dypvik, H., Hakansson, E., & Heinberg, C. (2002). Jurassic and Cretaceous palaeogeography and stratigraphic comparisons in the North Greenland-Svalbard region. Polar Research, 21(1), 91-108.	https://doi.org/10.1111/j.1751-8369.2002.tb00069.x	Dypvik et al., 2002;	Jurassic and Cretaceous	Aagardhfjellet, Rurikfjellet, Helvetiafjellet and Carolinefjellet formations	outcrops	-	shales, siltstones, sandstones	Svalbard and North Greenland	Plant fragments, belemnites, bivalves, vertebrate remains		-	-	-	-	-	Paleogeography - correlation
8	Grundvag, S. A., Jelby, M. E., Śliwińska, K. K., Nohr-Hansen, H., Aadland, T., Sandvik, S. E., Tennvassås, I., Engen, T.,& Olaussen, S. (2019). Sedimentology and palynology of the Lower Cretaceous succession of central Spitsbergen: integration of subsurface and outcrop data.	https://doi.org/10.17850/njg006	Grundvag et al, 2019;	Early Cretaceous	Rurikfjellet, Helvetiafjellet and Carolinefjellet formations	7 cores + outcrops	1800 m (cumulative thickness)	shale, sandstones, transgressive conglomerate lag	Nordenskiöld Land, DH1, DH2, DH3, DH4, DH5, DH6 and DH7A, the Bohemanflya outcrop	Palynology			-	Rock-Eval analyses, TOC	-	33 samples: DH1 (8 samples), DH2 (9 samples) and DH5R (11 samples), Bohemanflya outcrop section (5 samples)	Palynology, sedimentology, paleogeographic reconstructions, biostratigraphy, wireline and gamma ray logs, gas chromatogram
9	Grøsfjeld, K. (1992). Palynological age constraints on the base of the Helvetiafjellet Formation (Barremian) on Spitsbergen. Polar Research, 11(1), 11-19.	https://doi.org/10.3402/polar.v11i1.6713	Grøsfjeld, 1992;	Early Cretaceous (Barremian)	the uppermost part of the Rurikfjellet Member, Janusfjellet Formation	samples form thirteen localities	-	mudstones (black shale)	Western and central Spitsbergen	palynology
10	Hammer, Ø., Nakrem, H. A., Little, C. T., Hryniewicz, K., Sandy, M. R., Hurum, J. H., Druckenmiller, P., Knutsen,E.M. , & Høyberget, M. (2011). Hydrocarbon seeps from close to the Jurassic–Cretaceous boundary, Svalbard. Palaeogeography, Palaeoclimatology, Palaeoecology, 306(1-2), 15-26.	https://doi.org/10.1016/j.palaeo.2011.03.019	Hammer et al. 2011;	Late Jurassic to Early Cretaceous	Agardhfjellet Formation, uppermost Slottsmøya Member	outcrop	c 100m	mudstone, carbonates, sandstones	Janusfjellet to Knorringfjellet	stromatolitic structure, macrofauna		δ13C	δ18O/16O				hydrocarbon seeps
11	Hammer, Ø., Collignon, M. & Nakrem, H.A. (2012). Organic carbon isotope chemostratigraphy and cyclostratigraphy in the Volgian of Svalbard. Norwegian Journal of Geology, vol. 92., pp 103-112	-	Hammer et al., 2012	Late Jurassic	Agardhfjellet Formation	Outcrop	100m (c.220 in total)	Paper shales with siderite concretions	Knorringfjellet and Janusfjellet, central Spitsbergen			δ13Corg	δ18Ocarb from the Slottsmøya Member,	Rock-Eval and TOC	-		First recognition of the VOICE, Cyclostratigraphy
12	Hryniewicz, K., Nakrem, H. A., Hammer, Ø., Little, C. T., Kaim, A., Sandy, M. R., & Hurum, J. H. (2015). The palaeoecology of the latest Jurassic–earliest Cretaceous hydrocarbon seep carbonates from Spitsbergen, Svalbard. Lethaia, 48(3), 353-374.	https://doi.org/10.1111/let.12112	Hryniewicz et al., 2015	Late Jurassic to Early Cretaceous	Agardhfjellet Formation, uppermost Slottsmøya Member	outcrop, 16 seep car-bonate bodies	c. 50m	mudstone, carbonates, sandstones	Janusfjellet to Knorringfjellet	unusual, seep fauna							hydrocarbon seeps fauna
13	Hurum, J. H., Druckenmiller, P. S., Hammer, O., Nakrem, H. A., & Olaussen, S. (2016). The theropod that wasn't: an ornithopod tracksite from the Helvetiafjellet Formation (Lower Cretaceous) of Boltodden, Svalbard. Geological Society, London, Special Publications, 434(1), 189-206.	https://doi.org/10.1144/sp434.10	Hurum et al., 2016;	Lower Cretaceous	Helvetiafjellet Formation	outcrop		mudstones, sandstones	Boltodden	dinosaur foot prints (ornithopods…)		-	-	-	-	-	dinosaur tracksite, palaeogeographical reconstructions, photogrammetry
14	Jelby, M. E., Śliwińska, K. K., Koevoets, M. J., Alsen, P., Vickers, M. L., Olaussen, S., & Stemmerik, L. (2020). Arctic reappraisal of global carbon-cycle dynamics across the Jurassic–Cretaceous boundary and Valanginian Weissert Event. Palaeogeography, Palaeoclimatology, Palaeoecology, 555, 109847.	https://doi.org/10.1016/j.palaeo.2020.109847	Jelby et al., 2020b;	Late Jurassic and Jurassic–Cretaceous	Janusfjellet Subgroup	cores DH 5 and DH6 + outcrop	over 600 m of core and over 475 of outcrop section	silisiclastics, shale-siltstones and sanstones, thin conglomerates	Myklegardfjellet, Bohemanflya	belemnites, bivalves, crinoids, gastropods, plant remains, serpulids, and age-diagnostic ammonites		δ13Corg	-	Rock-Eval pyrolysis	-	389 bulk-rock marine shale samples were collected through the Janusfjellet Subgroup from two outcrop sections and two onshore drill cores (18 samples were collected from the upper Valanginian – lower Barremian interval, 146 samples were collected from the upper Volgian – lower Barremian interval, 147 samples were collected from the Ryazanian – lower Barremian interval, 78 samples were collected f…	Weissert Event, biostratigraphy
15	Koevoets, M. J., Abay, T. B., Hammer, O., & Olaussen, S. (2016). High-resolution organic carbon–isotope stratigraphy of the Middle Jurassic–Lower Cretaceous Agardhfjellet Formation of central Spitsbergen, Svalbard. Palaeogeography, Palaeoclimatology, Palaeoecology, 449, 266-274.	https://doi.org/10.1016/j.palaeo.2016.02.029	Koevoets et al., 2016;	Middle Jurassic–Lower Cretaceous	Agardhfjellet Formation	cores + outcrop	>250 m	silisiclastics, shale-siltstones and sanstones, thin conglomerates	near Longyearbyen and field locations Deltaneset and Janusfjellet West	ammonites		δ13Corg	-	Rock Eval	-	108 samples from two drill cores (DH2 and DH5R) at 2.5 m intervals	chemostratigraphy, Rock Eval, litho- and biostratigraphy
	Koevoets, M. J., Hurum, J. H., & Hammer, Ø. (2018). New late jurassic teleost remains from the agardhfjellet formation, Spitsbergen, Svalbard. Norsk Geologisk Tidsskrift, 98(2), 1-12.	https://dx.doi.org/10.17850/njg98-2-01	Koevoets et al., 2018	Middle Jurassic to lowermost Cretaceous	Agardhfjellet Formation	Well: DH2		silisiclastics, shale-siltstones and sanstones, thin conglomerates		teleost
16	Koevoets, M. K., Hammer, O., & Little, C. T. (2019). Palaeoecology and palaeoenvironments of the Middle Jurassic to lowermost Cretaceous Agardhfjellet Formation (Bathonian-Ryazanian), Spitsbergen, Svalbard. Norwegian Journal of Geology, 99(1).	https://orcid.org/0000-0002-1917-4460	Koevoets et al., 2019;	Middle Jurassic to lowermost Cretaceous	Agardhfjellet Formation	cores + outcrop	recovered: 250 m	silisiclastics, shale-siltstones and sanstones, thin conglomerates	wells: DH2, DH5R (airport, CO2 lab), Janusfjellet	bivalve and ammonite (+ vertebrates, palynology and microfossils, echinoderms, hydrocarbon seep fauna) in black shales, sandstones, siltstones, siderite layers and carbonate concretions		-	-	-	-	-	Palaeoecology and palaeoenvironments
17	Løfaldli, M. & Thusu, B. 1976: Microfossils from the Janusfjellet Subgroup (Jurassic-Lower Cretaceous) at Agardhfjellet and Keilhausfjellet, Spitsbergen. A preliminary report. Norsk Polarinstitutt Årbok, 125-136.	-	Løfaldli & Thusu 1976	Late Jurassic and Jurassic–Cretaceous	Janusfjellet Subgroup	outcrop		shale-siltstones	Agardfjellet and Keilhaufjellet	Microfossils
18	Midtkandal, I., Svensen, H. H., Planke, S., Corfu, F., Polteau, S., Torsvik, T. H., Faleide, J.-I., Grundvåg, S.-A., Selnes, H., Kürschner, W., & Olaussen, S. (2016). The Aptian (Early Cretaceous) oceanic anoxic event (OAE1a) in Svalbard, Barents Sea, and the absolute age of the Barremian-Aptian boundary. Palaeogeography, Palaeoclimatology, Palaeoecology, 463, 126-135.	https://doi.org/10.1016/j.palaeo.2016.09.023	Midtkandal et al., 2016;	The Aptian (Early Cretaceous)	Helvetiafjellet/Carolinefjellet Formation	three drillcores	-	shale, sandstones, transgressive conglomerate lag	wells: DH1, DH3, DH7 (airport, CO2 lab)			δ13CTOC	-	Rock eEval	-	17 samples: palynomorphs, 39: Rock Eval and δ13CTOC	chemostratigraphic analysis, the absolute age of the Barremian-Aptian boundary, bentonite
19	Price, G. D., & Nunn, E. V. (2010). Valanginian isotope variation in glendonites and belemnites from Arctic Svalbard: Transient glacial temperatures during the Cretaceous greenhouse. Geology, 38(3), 251-254.	https://doi.org/10.1130/G30593.1	Price and Nunn 2010; https://doi.org/10.1130/G30593.1	Cretaceous (Valanginian)	Rurikfjellet Formation	outcrop	c. 150 m	mudstones, siltstones and sandstones	Festningen	belemnites	glendonites	d13C in belemnites	δ18O in belemnites	-	-	-	-
20	Rakociński, M., Zatoń, M., Marynowski, L., Gedl, P., & Lehmann, J. (2018). Redox conditions, productivity, and volcanic input during deposition of uppermost Jurassic and Lower Cretaceous organic-rich siltstones in Spitsbergen, Norway. Cretaceous Research, 89, 126-147.	https://doi.org/10.1016/j.cretres.2018.02.014	Rakociński, et al., 2018;	Uppermost Jurassic and Lower Cretaceous	Rurikfjellet Formation	outcrop			northern end of Forkastningsfjellet,	Ammonites, dinocyst biostratigraphy							organic and inorganic geochemistry as well as Rock-Eval pyrolysis
21	Senger, K., Planke, S., Polteau, S., Ogata, K., Svensen, H.: Sill emplacement and contact metamorphism in a siliciclastic reservoir on Svalbard, Arctic Norway. Norwegian Journal of Geology,Vol 94, pp. 155–169. Trondheim 2014. ISSN 029-196X.	https://doi.org/10.1016/j.earscirev.2014.09.002	Senger et al, 2014;	Upper Triassic– Middle Jurassic	Kapp Toscana Group,	8 boreholes + outcrop	-	shales, Igneous intrusions (dolerite)	CO2 lab			δ13C analyses, TOC	-	source rock discrimination	-	33 samples	Fieldwork, 2D seismic, magnetic and borehole data
22	Smelror, M., & Larssen, G. B. (2016). Are there Upper Cretaceous sedimentary rocks preserved on Sørkapp land, Svalbard?. Norwegian Journal of Geology, 96(2).	http://dx.doi.org/10.17850/njg96-2-05	Smelror & Larssen 2016;	Cretaceous (Apian to middle Upper Albian)-Paleogene (the Lower to Mid Thanetian)	Adventdalen Group (the Carolinefjellet Formation), Van Mijenfjorden Group (Firkanten and Basilika formations)	Outcrop		mudstones, siltstones and sandstones	Sørkapp Land	Palynology						53 samples
23	Smelror, M., Larssen, G. B., Olaussen, S., Rømuld, A., & Williams, R. (2018). Late Triassic to Early Cretaceous palynostratigraphy of Kong Karls Land, Svalbard, Arctic Norway, with correlations to Franz Josef Land, Arctic Russia. Norwegian Journal of Geology, 98(4).	https://dx.doi.org/10.17850/njg004	Smelror et al., 2018;	The Upper Triassic, Jurassic and Lower Cretaceous	Wilhelmøya Subgroup and Adventdalen Group	Outcrop		mudstones, siltstones and sandstones	Kong Karls Land,	marine and terrestrial palynomorph
24	Śliwińska, K. K., Jelby, M. E., Grundvåg, S. A., Nøhr-Hansen, H., Alsen, P., & Olaussen, S. (2020). Dinocyst stratigraphy of the Valanginian–Aptian Rurikfjellet and Helvetiafjellet formations on Spitsbergen, Arctic Norway. Geological Magazine, 157(10), 1693-1714.	https://doi.org/10.1017/S0016756819001249	Sliwinska et al. 2020	Valanginian–Aptian	Rurikfjellet and Helvetiafjellet formations	outcrops and cores	-		DH1, DH2 and DH5R and outcrop sections (Bohemanflya, Myklegardfjellet and Ullaberget)	dinoflagellate cysts (dinocysts),							biostratigraphic framework for the Rurikfjellet and Helvetiafjellet formations
25	Thusu, B. (1978). Aptian to Toarcian dinoflagellate cysts from Arctic Norway. Distribution of biostratigraphically diagnostic dinoflagellate cysts and miospores from the northwest European continental shelf and adjacent areas, 100, 61-95.	-	Thusu, 1978	Aptian to Toarcian		Outcrop		mudstones, siltstones and sandstones		dinoflagellate cysts
26	Vasileva, K., Rogov, M., Ershova, V., Mikhailova, K., Vereshchagin, O., & Pokrovsky, B. (2024). Ikaite versus seep-related carbonate precipitation in the Late Jurassic–Early Cretaceous of West Spitsbergen: evidence for cold versus warm climates?. International Journal of Earth Sciences, 113(2), 417-439.	https://doi.org/10.1007/s00531-023-02380-9	Vasileva et al., 2024	Late Jurassic Early Cretaceous	Aagardhfjellet and Rurikfjellet, Fm.	Outcrop and boreholes DH2-4	c. 400 m	mudstones, siltstones and sandstones and carbonate seeps	Central Spitsbergen (Festingen, Janusfjellet), Myklegardfjellet /East coast of Spitsbergen) and DH 2-4		Glendonites	δ13C carbonate seeps and glendonites
27	Vickers, M. L., Price, G. D., Jerrett, R. M., & Watkinson, M. (2016). Stratigraphic and geochemical expression of Barremian–Aptian global climate change in Arctic Svalbard. Geosphere, 12(5), 1594-1605.	https://doi.org/10.1130/GES01344.1	Vickers et al., 2016	Early Cretaceous	Rurikfjellet, Helvetiafjellet, Carolinefjellet	outcrop	section between 396 m and 706 m	mudstones and sandstones	Festningen	Wood samples		δ13C and Total Organic Carbon Analysis	-	-	-	139 macro-wood samples and 104 bulk-rock samples	carbon-isotope stratigraphies, biostratigraphy
28	Vickers, M. L., Price, G. D., Jerrett, R. M., Sutton, P., Watkinson, M. P., & FitzPatrick, M. (2019). The duration and magnitude of Cretaceous cool events: Evidence from the northern high latitudes. GSA Bulletin, 131(11-12), 1979-1994.	https://doi.org/10.1130/B35074.1	Vickers et al., 2019	Upper Jurassic - Lower Cretaceous	Rurikfjellet, Helvetiafjellet and Carolinefjellet Fm.	outcrops and cores		mudstones and sandstones	Festingen, DH1		glendonites	δ13Cbulk org				463 samples from Festningen section	Carbon isotope stratigraphy
29	Vickers, M.L., Jelby, M.E., Śliwińska, K.K., Percival, L.M.E., Wang, F., Sanei, H., Price, G.D., Ullmann, C.V., Grasby, S.E., Reinhard, L., Mather, T.A., Frieling, J., Korte, C., Jerrett, R.M., Jones, M.T., Midtkandal, I. and Galloway, J.M. 2023. Volcanism and carbon cycle perturbations in the High Arctic during the Late Jurassic – Early Cretaceous. Palaeogeography, Palaeoclimatology, Palaeoecolo…	https://doi.org/10.1016/j.palaeo.2023.111412	Vickers et al., 2023	Early Cretaceous	Aagardhfjellet, Rurikfjellet, Helvetiafjellet and Carolinefjellet Fm.	Core and outcrop	> 600m	Shale and sandstone with scattered siderite concretions	Festningen section, Kvalvågen section,	Palynology		δ13C and Total Organic Carbon Analysis	-	TOC	total mercury (THg)	(Festningen: 180 samples, and the entire Kvalvågen section (39 samples)	Investigation of link between volcanism and carbon cycling
30	Århus, N. (1991). Dinoflagellate cyst stratigraphy of some Aptian and Albian sections from North Greenland, southeastern Spitsbergen and the Barents Sea. Cretaceous Research, 12(3), 209-225.	https://doi.org/10.1016/0195-6671(91)90035-B	Århus, 1991	Aptian to middle Albian	Janusfjellet Formation, Helvetiafjellet Formation and Carolinefjellet formation	outcrop	over 1000m	mudstones and sandstones	North Greenland and Spitsbergen (% section in Kvalvågen area),shallow coreholes in the southwestern Barents	Dinoflagellate cyst

## Sheet: Paleogene
	Publication	DOI/URL/ URI	Publication	Time period	Lithostratigraphy	Section				Proxies and data							Comments
						Drill core / outcrop?	Length	Lithology	Location	Biological	climate sensitive facies	d13C	δ18O	Rock-Eval	Hg	Sampling resolution	(main focus)
1	Clifton, A. (2012). The Eocene flora of Svalbard and its climatic significance (p. 401). PhD thesis. Leeds, UK: University of Leeds.	-	Clifton, A. 2012	Eocene	Aspelintoppen	outcrop (seven site locations), and four cores sequences	sections range from 13 to 198 m	alternating sandstone benches and heavily weathered shales	Nordenskioldfjellet, Tillbergafjellet, Ringdalsfjellet, Liljevalchfjellet, Mefjellet, Høgsnyta, Brogniarfjella, BH11-2003, BH10-2006, BH9-2005, BH10-2008	Flora, fossil leaves							Eocene climate
2	Charles, A. J., Condon, D. J., Harding, I. C., Pälike, H., Marshall, J. E., Cui, Y., Kump, l., & Croudace, I. W. (2011). Constraints on the numerical age of the Paleocene‐Eocene boundary. Geochemistry, Geophysics, Geosystems, 12(6).	http://dx.doi.org/10.1029/2010GC003426	Charles et al., 2011	Paleocene‐Eocene (P‐E)	Hollenderdalen and Frysjaodden formations,	Longyearbyen outcrop section and core BH9/05	70m	homogeneous mudstones	longyearbyen			(d13CTOC		TOC [%];			radioisotopic dating (U‐Pb zircon) and cyclostratigraphic analysis, CIE and Fe [ppm]
3	Cui, Y., Kump, L. R., Ridgwell, A., Diefendorf, A., & Junium, C. K. (2010). A high-resolution record from Svalbard of carbon release during the Paleocene-Eocene thermal maximum. Journal of Earth Science, 21, 190.	DOI:10.1007/s12583-010-0208-8	Cui et al 2010	Paleocene–Eocene		core BH9/05	50 m in thickness	-	BH9-05	-	methane clathrate, coal/peat/marine organic matter	d13Ccarbonate	-	-	-	-	Paleocene–Eocene Thermal Maximum	-
4	Doerner, M., Berner, U., Erdmann, M., & Barth, T. (2020). Geochemical characterization of the depositional environment of Paleocene and Eocene sediments of the Tertiary Central Basin of Svalbard. Chemical Geology, 542, 119587.		Doerner et al 2020	Palaeogene	Van Mijenfjorden Group	Borehole BH 10-2008,	1000 m	Mudstones and sandstones	BH 10-2008,	-	-	δ13C org,	-	Rock-Eval type pyrolysis	-		XRF, ICP-MS, QEMSCAN, CNS-elemental analyses
5	Dalland, A. (1977). Erratic clasts in the Lower Tertiary deposits of Svalbard—Evidence of transport by winter ice. Norsk Polarinstitutt Årbok, 1976, 151–165.		Dalland, A., 1977	Paleocene, Eocene		outcrop					Erratic clasts
6	Dypvik, H., Riber, L., Burca, F., Rüther, D., Jargvoll, D., Nagy, J., & Jochmann, M. (2011). The Paleocene–Eocene thermal maximum (PETM) in Svalbard—clay mineral and geochemical signals. Palaeogeography, Palaeoclimatology, Palaeoecology, 302(3-4), 156-169.	https://doi.org/10.1016/j.palaeo.2010.12.025	Dypvik et al, 2011	Paleogene	Grumantbyen and Frysjaodden formations,	drillcore BH9/05 and field outcrops	300 m thick	Mudstones and sandstones	Nordenskiöldfjellet section, borehole BH9/05	-	kaolinite abundances reflecting a period with intensified chemical weathering	-	-	-	-		clay mineral and geochemical analysis, XRD, Th/U distribution	-
7	Harding, I. C., Charles, A. J., Marshall, J. E., Pälike, H., Roberts, A. P., Wilson, P. A.,Jarvis, E., Thorne, R., Morris, E., Moremon, R., Pearce, R.B., & Akbari, S. (2011). Sea-level and salinity fluctuations during the Paleocene–Eocene thermal maximum in Arctic Spitsbergen. Earth and Planetary Science Letters, 303(1-2), 97-107.	https://doi.org/10.1016/j.epsl.2010.12.043	Harding et al., 2011	Paleocene–Eocene	Frysjaodden Formation, the Gilsonryggen Member	outcrops, Hollendardalen Formation	28 m	Mudstones	eastern side of Nordenskiöldfjellet	palynomorph	-	δ13CTOC on 28m	-	TOC	-	18 samples (paleomagnetism), 77 samples (XRD)	XRD, Sedimentological, palynological and geochemical data, paleomagnetic analyses, clay minerals	-
8	Jones, M. T., Percival, L. M., Stokke, E. W., Frieling, J., Mather, T. A., Riber, L., Schubert, B.A., Schultz, B., Tegner, C., Planke S., & Svensen, H. H. (2019). Mercury anomalies across the Palaeocene–Eocene thermal maximum. Climate of the Past, 15(1), 217-236.	https://doi.org/10.5194/cp-15-217-2019	Jones et al., 2019		Frysjaodden Formation	drillcore BH09/2005	90 m	Mudstones	borehole BH9/05	-	-		-	TOC	Hg	Hg, TOC, and 187Os∕188Os
9	Manum, S. B., & Throndsen, T. (1978). Rank of coal and dispersed organic matter and its geological bearing in the Spitsbergen Tertiary. Norsk Polarinstitutt Årbok, 1977, 159–177.		Manum, S.B. and Throndsen, T. (1978)	Paleogene- Eocene, Oligocene (?)	Van Mijefjorden Group	outcrops, Hollendardalen Formation	900 m	Coal, mudstones and sandstones	Central Spitsbergen, 28 sampling locations of the Firkanten Formation , and 900 m ling section at Nordenskioldfjellet	organc matter	coal					Vitrinite reflectance on coals and dispersed organic
10	Marshall, C., Uguna, J., Large, D. J., Meredith, W., Jochmann, M., Friis, B., … Orheim, A. (2015). Geochemistry and petrology of palaeocene coals from Spitzbergen—Part 2: Maturity variations and implications for local and regional burial models. International Journal of Coal Geology, 143, 1–10. coal.2015.03.013	https://doi.org/10.1016/j.coal.2015.03.013	Marshall, C., et al. 2015a,b,	Paleocene	Firkanten Formation	drillcore and outcrop	-	coal	Mines: Svea Nord and Mine 7, boreholes from the Lunckefjellet (BH6A-2007, BH10/2007, BH10/2009, BH15/2011), Adventdalen (BH4/2009, BH5/2009) and Colesdalen (BH3/2008) and field section from Bassen	organc matter	coal	-	-	yes	-	coal maceral analysis, Coal vitrinite reflectance (Ro)
11	Marshall, C. J. (2013). Palaeogeographic development and economic potential of the coal-bearing palaeocene Todalen Member, Spitsbergen (Doctoral dissertation, University of Nottingham).		Marshall (2013)	Paleocene	Firkanten Formation	drillcore and outcrop	-	coal	-	organc matter	coal	-	-	Rock Eval Hydrogen Index (HI), TOC (wt%)	-	-		-
12	Nagy, J., Jargvoll, D., Dypvik, H., Jochmann, M., & Riber, L. (2013). Environmental changes during the Paleocene–Eocene Thermal Maximum in Spitsbergen as reflected by benthic foraminifera. Polar Research, 32(1), 19737.	-	Nagy et al., 2013	The Paleocene-Eocene Thermal Maximum (PETM)	Frysjaodden Formation	Outcrop and core BH9/05	436	Mudstones and sandstones	borehole BH9/05	foraminifera bio-facies, Reticulophragmium replaced by Trochamminafauna.		-	-	-	-	66 mudstone samples, 1:20	thorium/uranium ratio (proxy for oxygenation), kaolinite content (proxy for high humidity)	-
13	Schlegel, A., Lisker, F., Dörr, N., Jochmann, M., Schubert, K., & Spiegel, C. (2013). Petrography and geochemistry of siliciclastic rocks from the Central Tertiary Basin of Svalbard–implications for provenance, tectonic setting and climate. Zeitschrift der Deutschen Gesellschaft für Geowissenschaften, 164(1), 173-186.	DOI: 10.1127/1860-1804/2013/0012	Schlegel et al., 2013	Paleocene- Eocene	Van Mijen Group	two boreholes	-	-	Store Norske wells 11-2003 and 07-2006	-	feldspar, illite and kaolinite content	-	-	-	-	-	mineral and chemical composition	-
14	Spielhagen, R. F., & Tripati, A. (2009). Evidence from Svalbard for near-freezing temperatures and climate oscillations in the Arctic during the Paleocene and Eocene. Palaeogeography, Palaeoclimatology, Palaeoecology, 278(1-4), 48-56.	https://doi.org/10.1016/j.palaeo.2009.04.012	Spielhagen & Tripati 2009	Paleogene	Van Mijenfjorden Group, isotope data from Firkanten and Basilika formations	outcrops	-	Mudstones and sandstones	Central Spitsbergen, key area around Hollendarbukta	plant debris, bivalves, trace fossils	coal seams, glendonites (calcite pseudomorphs after calcium carbonate hexahydrate) and erratics	δ13C on glendonites and shell (6 samples)	δ18O on glendonite and shell	-	-	-	-	-
15	Uhl, D., Traiser, C., Griesser, U., & Denk, T. (2007). Fossil leaves as palaeoclimate proxies in the Palaeogene of Spitsbergen (Svalbard). Acta Palaeobotanica Krakow, 47, 89.	-	Uhl et al., 2007;	Lower Paleocene	Firkanten Formation	collection from the Swedish Museum of Natural History (S) in Stockholm	-	Mudstones and sandstones	Central Spitsbergen	Fossol leaves		-	-	-	-	-	-	-
16	Wappler, Torsten, and Thomas Denk. (2011) "Herbivory in early Tertiary Arctic forests." Palaeogeography, Palaeoclimatology, Palaeoecology 310.3-4: 283-295.	https://doi.org/10.1016/j.palaeo.2011.07.020	Wappler & Denk, 2011	Palaeogene	Van Mijenfjorden and Calyosostranda groups	collection from the Swedish Museum of Natural History (S) in Stockholm	-	Mudstones and sandstones	Central Spitsbergen	insect trace fossils (galls, mines, and feeding traces) on fossil leaves	1567 fossil angiosperm leaves from Svalbard	-	-	-
17	Wieczorek, Rebecca, Matthew S. Fantle, Lee R. Kump, and Gregory Ravizza. "Geochemical evidence for volcanic activity prior to and enhanced terrestrial weathering during the Paleocene Eocene Thermal Maximum." Geochimica et Cosmochimica Acta 119 (2013): 391-410.	https://doi.org/10.1016/j.gca.2013.06.005	Wieczorek et al., 2013	Paleocene-Eocene	upper Grumantbyen Formation, the Frysjaodden Formation, and the Batfjellet Formation	Core BH 9/05	63m	gray mudstones	the Van Mijenfjorden inlet								Re–Os and major element geochemistry, 187Os/188Os,
									18
